# Supplementary material
Source: PubMed Central journal article supplement (PMC2861557)
Supplement: NIHMS191276-supplement-01.pdf [file NIHMS191276-supplement-01.pdf]

**Supplemental Table 1. Mean (and Peak) T Concentrations**

| <u>Moiety</u>   | <u>Dose per Pulse</u>                                            |                                                                 |                                                               |                                                                 |
|-----------------|------------------------------------------------------------------|-----------------------------------------------------------------|---------------------------------------------------------------|-----------------------------------------------------------------|
|                 | <u>0.46 <math>\mu</math>mol (N = 7)</u>                          | <u>1.4 <math>\mu</math>mol (N = 9)</u>                          | <u>4.2 <math>\mu</math>mol (N = 9)</u>                        | <u>1.7 <math>\mu</math>mol* (N = 5)</u>                         |
| Total T         | 9.6 $\pm$ 0.97 <sup>B†</sup><br>(20 $\pm$ 2.3) <sup>A†</sup>     | 15 $\pm$ 1.4 <sup>C†</sup><br>(35 $\pm$ 4.3) <sup>B†</sup>      | 21 $\pm$ 2.1 <sup>C†</sup><br>(47 $\pm$ 3.7) <sup>B†</sup>    | 5.7 $\pm$ 1.0 <sup>A†</sup><br>(12 $\pm$ 1.9) <sup>A†</sup>     |
| SHBG-bound T    | 6.6 $\pm$ 0.87 <sup>AB†</sup><br>(12 $\pm$ 1.8) <sup>AB†</sup>   | 8.6 $\pm$ 0.97 <sup>BC</sup><br>(16 $\pm$ 2.3) <sup>AB</sup>    | 11 $\pm$ 1.5 <sup>C</sup><br>(20 $\pm$ 2.7) <sup>B</sup>      | 4.0 $\pm$ 0.49 <sup>A†</sup><br>(7.7 $\pm$ 0.62) <sup>A†</sup>  |
| Albumin-bound T | 2.7 $\pm$ 0.49 <sup>AB</sup><br>(6.7 $\pm$ 1.5) <sup>A</sup>     | 5.8 $\pm$ 1.0 <sup>BC</sup><br>(18 $\pm$ 3.5) <sup>B</sup>      | 8.7 $\pm$ 1.2 <sup>C</sup><br>(25 $\pm$ 2.7) <sup>B</sup>     | 1.6 $\pm$ 0.49 <sup>A</sup><br>(3.9 $\pm$ 1.2) <sup>A</sup>     |
| Free T          | 0.25 $\pm$ 0.045 <sup>AB</sup><br>(0.62 $\pm$ 0.14) <sup>A</sup> | 0.56 $\pm$ 0.094 <sup>BC</sup><br>(1.7 $\pm$ 0.32) <sup>B</sup> | 0.83 $\pm$ 0.11 <sup>C</sup><br>(2.4 $\pm$ 0.25) <sup>B</sup> | 0.15 $\pm$ 0.045 <sup>A</sup><br>(0.38 $\pm$ 0.11) <sup>A</sup> |
| Bioavailable T  | 2.6 $\pm$ 0.45 <sup>AB</sup><br>(5.9 $\pm$ 1.4) <sup>A</sup>     | 5.6 $\pm$ 0.90 <sup>BC</sup><br>(15 $\pm$ 2.9) <sup>B</sup>     | 9.5 $\pm$ 1.4 <sup>C</sup><br>(26 $\pm$ 3.4) <sup>B</sup>     | 1.7 $\pm$ 0.52 <sup>A</sup><br>(4.2 $\pm$ 1.3) <sup>A</sup>     |

\*Dose of 1.7  $\mu$ mol was infused over 1 min with no basal T infusion (other doses were infused over 30 min with basal T infusion). Data are mean (and peak)  $\pm$  SEM T concentrations.

Within rows, means having unshared (unique) alphabetic superscripts differ significantly ( $P \leq 0.01$ ).

Units are nmol/L.

† $P < 0.05$  vs all other values in the same column.

**Supplemental Table 2. Rapid T Half-Lives (min) by T Moiety and Dose**

| <u>Measure</u>  | <u>Dose per Pulse</u>                   |                                        |                                        |                                        |
|-----------------|-----------------------------------------|----------------------------------------|----------------------------------------|----------------------------------------|
|                 | <u>0.46 <math>\mu</math>mol (N = 7)</u> | <u>1.4 <math>\mu</math>mol (N = 9)</u> | <u>4.2 <math>\mu</math>mol (N = 9)</u> | <u>1.7 <math>\mu</math>mol (N = 5)</u> |
| Total T         | 1.3 (0.51 - 2.9)                        | 2.3 (1.6 - 4.8)                        | 1.1 (0.51 - 2.5)                       | 1.2 (0.0 - 3.1)                        |
| SHBG-bound T    | 1.1 (0.28 - 2.5)                        | 2.0 (1.2 - 4.1)                        | 1.2 (0.54 - 2.7)                       | 1.1 (0.15 - 3.1)                       |
| Albumin-bound T | 1.3 (0.49 - 2.8)                        | 2.1 (1.2 - 5.0)                        | 1.4 (0.76 - 2.9)                       | 0.96 (0.22 - 2.7)                      |
| Free T          | 1.1 (0.20 - 2.9)                        | 2.1 (1.2 - 5.0)                        | 1.5 (0.81 - 3.2)                       | 0.96 (0.22 - 2.7)                      |
| Bioavailable T  | 1.1 (0.20 - 2.9)                        | 1.6 (0.78 - 4.1)                       | 1.4 (0.78 - 3.0)                       | 0.96 (0.22 - 2.7)                      |
| Column Mean     | 1.2 (0.34 - 2.8)                        | 2.0 (1.2 - 4.6)                        | 1.3 (0.68 - 2.9)                       | 1.0 (0.16 - 2.9)                       |

Data are the geometric mean (95% confidence interval). Half-life units are min. There were no significant effects by T moiety (rows) or by T dose (columns), except for the 1.4  $\mu$ mol dose (*Results*).

Grand arithmetic mean  $\pm$  SEM of the four columns, 1.4  $\pm$  0.22 min.

**Supplemental Table 3. Slow T Half-Lives (min) by Moiety and Dose**

| <u>Measure</u>  | <u>Dose per Pulse</u>                   |                                        |                                        |                                        |
|-----------------|-----------------------------------------|----------------------------------------|----------------------------------------|----------------------------------------|
|                 | <u>0.46 <math>\mu</math>mol (N = 7)</u> | <u>1.4 <math>\mu</math>mol (N = 9)</u> | <u>4.2 <math>\mu</math>mol (N = 9)</u> | <u>1.7 <math>\mu</math>mol (N = 5)</u> |
| Total T         | 21 (11 - 37) <sup>A</sup>               | 27 (22 - 33) <sup>AB</sup>             | 31 (25 - 42) <sup>AB</sup>             | 27 (19 - 37) <sup>A</sup>              |
| SHBG-bound T    | 24 (15 - 39) <sup>A</sup>               | 37 (31 - 47) <sup>B</sup>              | 36 (29 - 60) <sup>A</sup>              | 31 (21 - 42) <sup>A</sup>              |
| Albumin-bound T | 15 (6.1 - 29) <sup>AB</sup>             | 17 (11 - 25) <sup>AC</sup>             | 21 (15 - 30) <sup>B</sup>              | 20 (14 - 27) <sup>B</sup>              |
| Free T          | 14 (5.0 - 29) <sup>AB</sup>             | 16 (10 - 26) <sup>AC</sup>             | 23 (18 - 32) <sup>B</sup>              | 20 (14 - 28) <sup>B</sup>              |
| Bioavailable T  | 7.0 (4.0 - 12) <sup>B*</sup>            | 11 (3.2 - 28) <sup>C</sup>             | 18 (14 - 30) <sup>B*</sup>             | 20 (14 - 27) <sup>B</sup>              |
| P values        | 0.020                                   | < 0.001                                | 0.013                                  | 0.027                                  |

Data are the geometric mean (95% confidence interval).

Means within columns with unique (unshared) alphabetical superscripts differ at  $P < 0.05$  by *post hoc* comparisons. Thus, A differs from B, but not from AB.

\* $P = 0.002$  for the comparison by dose within the bioavailable-T row.

**Supplemental Table 4. Testosterone Mass per Pulse**

|                 | T Pulse Dose                            |                                        |                                        |                                        |
|-----------------|-----------------------------------------|----------------------------------------|----------------------------------------|----------------------------------------|
|                 | <u>0.46 <math>\mu</math>mol (N = 7)</u> | <u>1.4 <math>\mu</math>mol (N = 9)</u> | <u>4.2 <math>\mu</math>mol (N = 9)</u> | <u>1.7 <math>\mu</math>mol (N = 5)</u> |
| Total T         | 17 $\pm$ 1.5 <sup>A</sup>               | 35 $\pm$ 3.2 <sup>A</sup>              | 49 $\pm$ 3.1 <sup>A</sup>              | 9.5 $\pm$ 1.5 <sup>A</sup>             |
| SHBG-bound T    | 10 $\pm$ 1.1 <sup>AB</sup>              | 13 $\pm$ 2.1 <sup>BC</sup>             | 22 $\pm$ 4.3 <sup>BC</sup>             | 6.3 $\pm$ 0.69 <sup>AB</sup>           |
| Albumin-bound T | 6.7 $\pm$ 1.5 <sup>B</sup>              | 20 $\pm$ 3.2 <sup>AC</sup>             | 31 $\pm$ 2.9 <sup>ACE</sup>            | 2.9 $\pm$ 0.90 <sup>B</sup>            |
| Free T          | 0.62 $\pm$ 0.14 <sup>C</sup>            | 1.9 $\pm$ 0.30 <sup>D</sup>            | 2.8 $\pm$ 0.26 <sup>D</sup>            | 0.28 $\pm$ 0.087 <sup>C</sup>          |
| Bioavailable T  | 8.3 $\pm$ 2.0 <sup>B</sup>              | 22 $\pm$ 4.3 <sup>AB</sup>             | 28 $\pm$ 4.1 <sup>BE</sup>             | 3.2 $\pm$ 1.0 <sup>B</sup>             |
| P values        | < 0.001                                 | < 0.001                                | < 0.001                                | 0.001                                  |

Data are the mean  $\pm$  SEM in units of nmol/L.

All T doses (across columns) differed from one another ( $P \leq 0.004$ ).

Within columns, means having unshared (unique) alphabetic superscripts differ significantly ( $P \leq 0.01$ ).
